# Supplementary material for: Variation in the concentration and regional distribution of magnetic nanoparticles in human brains, with and without Alzheimer’s disease, from the UK
Source: PubMed Central journal article supplement (PMC8087805; doi:10.1038/s41598-021-88725-3), 2021-04-30
Supplement: 41598_2021_88725_MOESM1_ESM.pdf [file 41598_2021_88725_MOESM1_ESM.pdf]

# Variation in the concentration and regional distribution of magnetic nanoparticles in human brains, with and without Alzheimer's disease, from the UK

Jessica Hammond<sup>1,\*</sup>, Barbara A. Maher<sup>2,\*</sup>, Imad A. M. Ahmed<sup>3</sup>, and David Allsop<sup>1</sup>

<sup>1</sup>Division of Biomedical and Life Sciences, Faculty of Health and Medicine, Lancaster University, LA1 4YQ, U.K

<sup>2</sup>Centre for Environmental Magnetism and Palaeomagnetism, Lancaster Environment Centre, Lancaster University, LA1 4YQ, U.K.

<sup>3</sup>Department of Earth Sciences, University of Oxford, OX1 3AN, U.K.

\*jessica.hammond@lancaster.ac.uk, b.maher@lancaster.ac.uk

## Supplementary Information

### Supplementary methods

The measurement of (relatively) weakly magnetic samples of a biological nature presents several experimental challenges. At every stage, we have reduced and quantified any potential contamination (Supplementary Table S1). First, an appropriate, magnetically-clean environment was selected for sample preparation; a biological safety cabinet in a class III laboratory. Cabinet air throughflow was sampled using a Leland Legacy pump (SKC, Dorset UK) at 7.5L/min through a magnetically-‘clean’ 1  $\mu\text{m}$  PTFE filter, in order to quantify any magnetic ‘background’ associated with that environment.

**Supplementary Table S1** Sampling Air Quality

| Name           | Location | SIRM<br>( $\times 10^{-10} \text{ Am}^2$ ) | SIRM<br>( $\times 10^{-10} \text{ Am}^2/\text{m}^3$ ) | SIRM<br>( $\times 10^{-10} \text{ Am}^2/\text{min}$ ) |
|----------------|----------|--------------------------------------------|-------------------------------------------------------|-------------------------------------------------------|
| CL3(11/10/18)  | Hood     | 18.43                                      | 6.15                                                  | 0.0460                                                |
| CL3 (10/05/18) | Hood     | 9.7                                        | 5.44                                                  | 0.0400                                                |
| CEMP           | Bench    | 3.36                                       | 1.14                                                  | 0.0086                                                |
| CL3 (03/10/19) | Hood     | 1.45                                       | 0.57                                                  | 0.0043                                                |

CL3 = biological safety cabinet in class III laboratory, CEMP = Centre for Environmental Magnetism and Palaeomagnetism. The SIRM of clean 1  $\mu\text{m}$  PTFE filters was measured, these were then placed inside the pump and air was sampled for between 3 and 7 hours, which equates to 1.35-3.15 $\text{m}^3$  air. The SIRM of the exposed filters was then measured. The values above reflect the change in filter SIRM, post-exposure, at each location, normalised for the volume of air pumped, or per minute of exposure, on the two tissue sampling days. The last two rows represent a random sampling of the sample preparation area (hood) or sample measurement area (CEMP, bench).

The class III laboratory has double filtered air (high efficiency particulate air, HEPA, filters) inside the biological safety cabinet. Tissue samples were exposed within the hood for  $\sim 3$  minutes or less; this translates to potential magnetic accumulation of a minimum 1.20 E-12  $\text{Am}^2$  (i.e.,  $\sim 3$ -4 times lower than a typical 2G sample holder value) or a maximum 1.38 E-11  $\text{Am}^2$  ( $\sim 3$ -4 higher than a typical holder value).

In order to minimize contamination of the sample and clingfilm, all handling of clingfilm and samples was carried out in the biological safety cabinet. Clingfilm is necessary in order to secure and protect the freeze-dried samples which are fragile and will crumble if repeatedly manipulated. For each tissue sample measurement, the specific piece of clingfilm was pre-measured and demagnetised (pieces with an SIRM  $\geq 2 \times 10^{-10} \text{ Am}^2$  were rejected and not used for measurement). Clingfilm was cut from the centre of the roll using a ceramic knife. The SIRM of the clingfilm, ave.  $\sim 1 \times 10^{-10} \text{ Am}^2$ , is subtracted in order to isolate the tissue SIRM. On average, the clingfilm contributes  $\sim 23\%$  of the total measured SIRM (i.e. sample + pot + clingfilm). Tissue samples were measured in non-magnetised pots; the NRM of an empty pot ( $\sim 6 \times 10^{-12} \text{ Am}^2$ ) is weaker than a typical 2G sample holder value.

Cutting surfaces and ceramic knives were cleaned with 70% ethanol prior to use and between samples. To quantify any possible contamination from the ethanol, SIRM measurements were made on unfiltered and 1, 2 or 3x filtered 70% ethanol, as well as unfiltered  $\text{dH}_2\text{O}$ . SIRMs were measured at 77K on a JR6A magnetometer (noise level  $5 \times 10^{-11} \text{ Am}^2$ ); the SIRM of each solution, approximately 2g ( $\sim 2$ -2.3ml), was unmeasurable.

The outer surfaces of each sample were trimmed to remove any potential metal contaminants from the autopsy process, such as fragments from stainless steel instruments or debris from metal bone saws as per [1]. Some large samples and those with irregular geometry were further sub-divided into two samples, each sample measured separately and the final SIRM calculated by adding the two values as if it were one whole sample. For a selection of samples, the trimmings were measured as well as the sample. In some cases, trimming made little difference; in other cases, a failure to trim the sample would have made a large contribution to the measured signal, emphasising the need to control for contamination at every stage. Wet/dry ratios (i.e., the mean of the freeze-dried weight divided by the wet weight) ranged from 0.16 for entorhinal cortex samples and 0.19 for all other MBB samples.

Data presented here classes each Manchester case as either ‘AD’ or ‘control’. However, the pathological diagnosis in some cases is not as clear; for example, “probable AD” and “possible AD”. Data were also categorised as control, AD or “intermediate” if the case did not clearly belong to either the control or AD group and analysed using this classification system. There was no significant difference in ferrimagnetic concentration between AD and controls when using a 3 group classification (AD, Control, intermediate), a 2 group classification (all cases designated as either control or AD) or a 2 group

classification system omitting the intermediate cases (definite AD and definite controls only).

We note that samples from Manchester originated from the right hemisphere, whilst the previously-published Mexico City samples [4] originated from the left hemisphere. Limited tissue availability prevented us from using the same hemisphere from both populations. It is possible that variation exists between the left and right hemispheres in terms of magnetite/maghemite concentration and pathology. However, MRI studies have shown no interhemispheric differences in iron concentrations [2], and pathological examination of both AD and control hemispheres (as a whole group) showed similar Braak NFT staging and A $\beta$  deposition but increased vascular lesions in the left hemisphere [3]. In contrast, Gilder et al. report higher ferrimagnetic concentrations in the left hemisphere of the cerebral cortex than the right hemisphere in six of their seven cases [1].

**Supplementary Table S2** Summary case information Manchester, UK.

| <b>Case</b> | <b>Sex</b> | <b>Age</b> | <b>Pathological Diagnosis</b>      | <b>State</b> |
|-------------|------------|------------|------------------------------------|--------------|
| 09/15       | F          | 89         | AD                                 | AD           |
| 09/22       | F          | 90         | Possible AD                        | AD           |
| 09/37       | M          | 90         | Age changes only                   | Cont.        |
| 10/08       | F          | 87         | AD                                 | AD           |
| 10/13       | F          | 85         | AD                                 | AD           |
| 10/16       | M          | 91         | Moderate SVD                       | Cont.        |
| 10/26       | M          | 84         | Moderate SVD                       | Cont.        |
| 10/40       | M          | 86         | AD                                 | AD           |
| 12/09       | F          | 87         | Mild AD pathology in temporal lobe | AD           |
| 12/23       | M          | 95         | Age changes only                   | Cont.        |
| 12/33       | F          | 81         | Probable AD                        | AD           |
| 12/34       | F          | 80         | Probable AD                        | AD           |
| 13/09       | F          | 85         | AD                                 | AD           |
| 13/10       | F          | 85         | AD                                 | AD           |
| 14/01       | F          | 93         | Probable AD                        | AD           |
| 14/04       | F          | 87         | Age changes only                   | Cont.        |
| 14/07       | F          | 95         | Probable AD                        | AD           |
| 14/11       | M          | 91         | Mild SVD                           | Cont.        |
| 14/20       | F          | 90         | Age changes only                   | Cont.        |
| 14/46       | F          | 94         | Age changes only                   | Cont.        |
| 15/01       | M          | 90         | Age changes only                   | Cont.        |
| 15/19       | F          | 98         | Possible AD                        | AD           |
| 15/29       | M          | 81         | AD                                 | AD           |
| 15/31       | M          | 91         | Age changes only                   | Cont.        |
| 15/42       | M          | 89         | Incipient AD                       | Cont.        |
| 15/48       | F          | 81         | AD                                 | AD           |
| 16/01       | M          | 90         | Possible AD                        | AD           |
| 16/08       | M          | 88         | Incipient AD                       | AD           |
| 16/13       | M          | 91         | AD                                 | AD           |
| 16/14       | F          | 92         | AD                                 | AD           |

A selection of 30 brains from elderly individuals were obtained from the Manchester Brain Bank. The pathological diagnosis of these cases can be summarised as; 10 Alzheimer's Disease (AD), 7 controls (cont.) (age changes only), 4 probable AD, 3 possible AD, 2 incipient AD, 2 moderate small vessel disease (SVD), 1 mild SVD and 1 mild AD pathology in the temporal lobe.

**Supplementary Table S3** Regional distribution of magnetic remanence carriers in Manchester Brain Bank (MBB) Alzheimer's disease and control cases. Freeze dried (originally fresh frozen) brain tissue samples from the cerebellum, entorhinal cortex (EC), frontal, occipital and temporal lobes were exposed to a saturating DC field of 1 T and their saturation isothermal remanence magnetisation (SIRM) measured. Cases were classified as either control (cont.) or Alzheimer's disease (AD) based on their pathological diagnosis.

| <b>Region</b>    | <b>Samples (n)</b> | <b>SIRM range (<math>10^{-6}\text{Am}^2 \text{kg}^{-1}</math>)</b> | <b>Mean SIRM (<math>10^{-6}\text{Am}^2 \text{kg}^{-1}</math>)</b> | <b>Median SIRM (<math>10^{-6}\text{Am}^2 \text{kg}^{-1}</math>)</b> | <b>Mean magnetite (<math>\mu\text{g/g}</math>)</b> | <b>Mean (<math>10^9</math>) particles per g tissue</b> |
|------------------|--------------------|--------------------------------------------------------------------|-------------------------------------------------------------------|---------------------------------------------------------------------|----------------------------------------------------|--------------------------------------------------------|
| Cerebellum AD    | 17                 | 0.15-1.63                                                          | 0.63                                                              | 0.40                                                                | 0.05                                               | 0.57                                                   |
| Cerebellum Cont. | 11                 | 0.09-3.31                                                          | 1.01                                                              | 0.74                                                                | 0.07                                               | 0.91                                                   |
| EC AD            | 17                 | 0.13-0.81                                                          | 0.38                                                              | 0.30                                                                | 0.03                                               | 0.34                                                   |
| EC Cont.         | 9                  | 0.06-1.33                                                          | 0.45                                                              | 0.38                                                                | 0.03                                               | 0.40                                                   |
| Frontal AD       | 19                 | 0.16-13.69                                                         | 1.86                                                              | 0.57                                                                | 0.13                                               | 1.67                                                   |
| Frontal Cont.    | 11                 | 0.20-5.33                                                          | 1.13                                                              | 0.64                                                                | 0.08                                               | 1.01                                                   |
| Occipital AD     | 18                 | 0.08-9.73                                                          | 1.22                                                              | 0.51                                                                | 0.09                                               | 1.10                                                   |
| Occipital Cont.  | 10                 | 0.19-1.87                                                          | 0.73                                                              | 0.59                                                                | 0.05                                               | 0.66                                                   |
| Temporal AD      | 18                 | 0.12-5.96                                                          | 1.14                                                              | 0.67                                                                | 0.08                                               | 1.02                                                   |
| Temporal Cont.   | 11                 | 0.17-3.80                                                          | 0.89                                                              | 0.49                                                                | 0.06                                               | 0.80                                                   |

**Supplementary Table S4** Metal concentrations in the cerebellum of MBB Alzheimer's disease and control cases.

| Pathology | Case  | Region     | Aluminium | Cerium | Iron   | Lead | Platinum |
|-----------|-------|------------|-----------|--------|--------|------|----------|
| AD        | 09/15 | Cerebellum | 2.54      | 0.0019 | 321.95 | 0.09 | 0.0040   |
| AD        | 09/22 | Cerebellum | 5.00      | 0.0125 | 251.83 | 0.04 | 0.0031   |
| Control   | 09/37 | Cerebellum | 1.54      | 0.0059 | 313.48 | 0.09 | 2.2009   |
| AD        | 10/08 | Cerebellum | 2.50      | 0.0031 | 203.23 | 4.21 | 0.0005   |
| AD        | 10/13 | Cerebellum | 1.20      | 0.0013 | 231.30 | 0.06 | 0.0011   |
| Control   | 10/16 | Cerebellum | 2.01      | 0.0043 | 371.22 | 0.05 | 0.0004   |
| Control   | 10/26 | Cerebellum | 3.54      | 0.0014 | 248.54 | 1.16 | 0.0024   |
| AD        | 10/40 | Cerebellum | 0.84      | 0.0009 | 198.48 | 0.08 | 0.0007   |
| AD        | 12/09 | Cerebellum | 2.13      | 0.0042 | 202.37 | 0.03 | 0.0012   |
| Control   | 12/23 | Cerebellum | 0.48      | 0.0022 | 460.43 | 0.03 | 0.0006   |
| AD        | 12/33 | Cerebellum | 0.79      | 0.0046 | 260.53 | 0.04 | 0.0012   |
| AD        | 12/34 | Cerebellum | 3.13      | 0.0057 | 237.42 | 0.06 | 0.0000   |
| AD        | 13/09 | Cerebellum | 6.06      | 0.0047 | 415.17 | 0.07 | 0.0067   |
| AD        | 13/10 | Cerebellum | 2.29      | 0.0073 | 446.60 | 0.06 | 0.0023   |
| AD        | 14/01 | Cerebellum | 2.27      | 0.0009 | 270.21 | 0.05 | 0.0002   |
| Control   | 14/04 | Cerebellum | 0.68      | 0.0013 | 202.61 | 0.02 | 0.0007   |
| AD        | 14/07 | Cerebellum | 5.45      | 0.0110 | 285.95 | 0.05 | 0.0019   |
| Control   | 14/11 | Cerebellum | 2.69      | 0.0057 | 241.34 | 0.69 | 0.0024   |
| Control   | 14/20 | Cerebellum | 0.46      | 0.0024 | 530.43 | 0.93 | 0.0011   |
| Control   | 14/46 | Cerebellum | 14.83     | 0.0211 | 274.13 | 1.06 | 0.0029   |
| Control   | 15/01 | Cerebellum | 2.59      | 0.0014 | 281.04 | 0.03 | 0.0015   |
| AD        | 15/19 | Cerebellum | 0.74      | 0.0017 | 170.89 | 0.03 | 0.0005   |
| AD        | 15/29 | Cerebellum | 26.20     | 0.0025 | 265.09 | 0.03 | 0.0014   |
| Control   | 15/31 | Cerebellum | 0.87      | 0.0009 | 219.66 | 0.08 | 0.0011   |
| Control   | 15/42 | Cerebellum | 3.99      | 0.0054 | 328.71 | 0.04 | 0.0008   |
| AD        | 15/48 | Cerebellum | 2.09      | 0.0024 | 177.40 | 0.05 | 0.0011   |
| AD        | 16/01 | Cerebellum | 0.96      | 0.0024 | 316.42 | 0.07 | 0.0029   |
| AD        | 16/08 | Cerebellum | 2.50      | 0.0060 | 340.20 | 0.03 | 0.0007   |
| AD        | 16/13 | Cerebellum | 1.68      | 0.0017 | 429.83 | 2.88 | 0.0026   |
| AD        | 16/14 | Cerebellum | 6.19      | 0.0133 | 292.79 | 0.06 | 0.0037   |

ICP-MS was conducted on fresh/frozen brain tissue samples from the cerebellum to determine concentrations ( $\mu\text{g/g}$  dry tissue) of aluminium, cerium, iron, lead, and platinum. Cases were classified as either control or Alzheimer's disease (AD) based on their pathological diagnosis. \*Excluded from analysis as an extreme outlier.

**Supplementary Table S5** Metal concentrations in the frontal lobe of MBB Alzheimer's disease and control cases.

| Pathology | Case  | Region  | Aluminium | Cerium | Iron   | Lead | Platinum |
|-----------|-------|---------|-----------|--------|--------|------|----------|
| AD        | 09/15 | Frontal | 2.53      | 0.0007 | 350.36 | 0.07 | 0.0013   |
| AD        | 09/22 | Frontal | 0.70      | 0.0015 | 156.49 | 0.01 | 0.0000   |
| Control   | 09/37 | Frontal | 0.94      | 0.0040 | 184.82 | 0.08 | 0.0015   |
| AD        | 10/08 | Frontal | 3.71      | 0.0111 | 296.24 | 1.12 | 0.0022   |
| AD        | 10/13 | Frontal | 2.09      | 0.0014 | 163.26 | 0.04 | 0.0007   |
| Control   | 10/16 | Frontal | 10.02     | 0.0109 | 255.93 | 0.09 | 0.0016   |
| Control   | 10/26 | Frontal | 1.06      | 0.0007 | 200.60 | 1.00 | 0.0014   |
| AD        | 10/40 | Frontal | 0.57      | 0.0007 | 145.48 | 0.11 | 0.0005   |
| AD        | 12/09 | Frontal | 6.63      | 0.0090 | 267.12 | 0.04 | 0.0018   |
| Control   | 12/23 | Frontal | 1.59      | 0.0027 | 204.31 | 0.05 | 0.0014   |
| AD        | 12/33 | Frontal | 1.27      | 0.0012 | 244.31 | 0.07 | 0.0006   |
| AD        | 12/34 | Frontal | 18.44     | 0.0398 | 325.64 | 1.30 | 0.0052   |
| AD        | 13/09 | Frontal | 2.90      | 0.0037 | 209.90 | 0.08 | 0.0009   |
| AD        | 13/10 | Frontal | 1.82      | 0.0022 | 166.75 | 1.13 | 0.0003   |
| AD        | 14/01 | Frontal | 1.05      | 0.0008 | 215.35 | 0.05 | 0.0003   |
| Control   | 14/04 | Frontal | 2.18      | 0.0031 | 249.52 | 0.09 | 0.0024   |
| AD        | 14/07 | Frontal | 8.05      | 0.0136 | 311.85 | 0.10 | 0.0020   |
| Control   | 14/11 | Frontal | 12.04     | 0.0056 | 363.31 | 0.09 | 0.0013   |
| Control   | 14/20 | Frontal | 3.41      | 0.0075 | 395.07 | 0.15 | 0.0019   |
| Control   | 14/46 | Frontal | 14.06     | 0.0162 | 368.40 | 0.51 | 0.0022   |
| Control   | 15/01 | Frontal | 1.44      | 0.0008 | 199.99 | 0.03 | 0.0005   |
| AD        | 15/19 | Frontal | 1.28      | 0.0005 | 218.92 | 0.10 | 0.0003   |
| AD        | 15/29 | Frontal | 0.47      | 0.0006 | 191.17 | 0.02 | 0.0005   |
| Control   | 15/31 | Frontal | 2.17      | 0.0012 | 214.26 | 0.72 | 0.0023   |
| Control   | 15/42 | Frontal | 3.48      | 0.0030 | 257.34 | 0.04 | 0.0013   |
| AD        | 15/48 | Frontal | 0.93      | 0.0011 | 193.87 | 0.05 | 0.0005   |
| AD        | 16/01 | Frontal | 1.04      | 0.0012 | 276.23 | 0.11 | 0.0012   |
| AD        | 16/08 | Frontal | 3.61      | 0.0043 | 255.26 | 0.04 | 0.0000   |
| AD        | 16/13 | Frontal | 1.07      | 0.0025 | 273.38 | 0.03 | 0.0014   |
| AD        | 16/14 | Frontal | 6.19      | 0.0074 | 242.91 | 0.08 | 0.0005   |

**Supplementary Table S5.** ICP-MS was conducted on fresh frozen brain tissue samples from the frontal lobe to determine concentrations ( $\mu\text{g/g}$  dry tissue) of aluminium, cerium, iron, lead, and platinum. Cases were classified as either control or Alzheimer's disease (AD) based on their pathological diagnosis.

**Supplementary Table S6** Metal concentrations in the occipital lobe of MBB Alzheimer's disease and control cases

| Pathology | Case  | Region    | Aluminium | Cerium | Iron   | Lead | Platinum |
|-----------|-------|-----------|-----------|--------|--------|------|----------|
| AD        | 09/15 | Occipital | 7.95      | 0.0025 | 274.71 | 0.13 | 0.0031   |
| AD        | 09/22 | Occipital | 2.83      | 0.0059 | 317.16 | 0.02 | 0.0015   |
| Control   | 09/37 | Occipital | 1.96      | 0.0067 | 229.05 | 0.11 | 0.0011   |
| AD        | 10/08 | Occipital | 4.01      | 0.0128 | 485.98 | 2.03 | 0.0050   |
| AD        | 10/13 | Occipital | 1.50      | 0.0013 | 199.43 | 0.03 | 0.0007   |
| Control   | 10/16 | Occipital | 2.02      | 0.0022 | 288.43 | 0.06 | 0.0021   |
| Control   | 10/26 | Occipital | 0.68      | 0.0010 | 234.02 | 0.07 | 0.0007   |
| AD        | 10/40 | Occipital | 0.55      | 0.0006 | 183.60 | 0.04 | 0.0003   |
| AD        | 12/09 | Occipital | 2.05      | 0.0023 | 345.71 | 0.02 | 0.0010   |
| Control   | 12/23 | Occipital | 0.53      | 0.0020 | 258.43 | 0.03 | 0.0011   |
| AD        | 12/33 | Occipital | 0.92      | 0.0011 | 239.99 | 0.05 | 0.0009   |
| AD        | 12/34 | Occipital | 9.60      | 0.0229 | 426.80 | 0.11 | 0.0095   |
| AD        | 13/09 | Occipital | 5.88      | 0.0091 | 522.22 | 0.06 | 0.0010   |
| AD        | 13/10 | Occipital | 2.49      | 0.0058 | 342.91 | 0.25 | 0.0019   |
| AD        | 14/01 | Occipital | 1.58      | 0.0007 | 176.10 | 0.03 | 0.0002   |
| Control   | 14/04 | Occipital | 2.03      | 0.0040 | 236.08 | 0.04 | 0.0011   |
| AD        | 14/07 | Occipital | 4.36      | 0.0088 | 311.80 | 0.05 | 0.0018   |
| Control   | 14/11 | Occipital | 4.45      | 0.0054 | 336.82 | 0.04 | 0.0025   |
| Control   | 14/20 | Occipital | 3.09      | 0.0063 | 352.72 | 0.07 | 0.0015   |
| Control   | 14/46 | Occipital | 8.58      | 0.0127 | 313.94 | 0.12 | 0.0023   |
| Control   | 15/01 | Occipital | 0.81      | 0.0005 | 223.32 | 0.02 | 0.0003   |
| AD        | 15/19 | Occipital | 1.25      | 0.0013 | 179.53 | 0.05 | 0.0003   |
| AD        | 15/29 | Occipital | 1.36      | 0.0015 | 256.63 | 0.03 | 0.0004   |
| Control   | 15/31 | Occipital | 2.17      | 0.0007 | 282.42 | 0.34 | 0.0013   |
| Control   | 15/42 | Occipital | 1.69      | 0.0027 | 263.99 | 0.42 | 0.0008   |
| AD        | 15/48 | Occipital | 0.85      | 0.0012 | 243.73 | 0.04 | 0.0009   |
| AD        | 16/01 | Occipital | 1.52      | 0.0015 | 204.38 | 0.06 | 0.0003   |
| AD        | 16/08 | Occipital | 1.91      | 0.0054 | 269.33 | 0.04 | 0.0000   |
| AD        | 16/13 | Occipital | 0.82      | 0.0004 | 360.18 | 0.04 | 0.0006   |
| AD        | 16/14 | Occipital | 3.09      | 0.0042 | 287.09 | 0.06 | 0.0010   |

ICP-MS was conducted on fresh frozen brain tissue samples from the occipital lobe to determine concentrations ( $\mu\text{g/g}$  dry tissue) of aluminium, cerium, iron, lead, and platinum. Cases were classified as either control or Alzheimer's disease (AD) based on their pathological diagnosis.



**Supplementary Table S7** Metal concentrations in the temporal lobe of MBB Alzheimer's disease and control cases.

| Pathology | Case  | Region   | Aluminium | Cerium | Iron   | Lead | Platinum |
|-----------|-------|----------|-----------|--------|--------|------|----------|
| AD        | 09/15 | Temporal | 1.39      | 0.0002 | 237.63 | 0.05 | 0.0005   |
| AD        | 09/22 | Temporal | 6.22      | 0.0170 | 336.78 | 0.05 | 0.0032   |
| Control   | 09/37 | Temporal | 7.46      | 0.0082 | 191.31 | 0.11 | 0.0031   |
| AD        | 10/08 | Temporal | 2.32      | 0.0066 | 272.73 | 0.59 | 0.0022   |
| AD        | 10/13 | Temporal | 1.20      | 0.0010 | 193.67 | 0.03 | 0.0007   |
| Control   | 10/16 | Temporal | 3.96      | 0.0056 | 226.83 | 0.10 | 0.0006   |
| Control   | 10/26 | Temporal | 1.85      | 0.0001 | 200.12 | 0.25 | 0.0004   |
| AD        | 10/40 | Temporal | 0.83      | 0.0007 | 192.89 | 0.11 | 0.0005   |
| AD        | 12/09 | Temporal | 1.35      | 0.0031 | 285.63 | 0.04 | 0.0004   |
| Control   | 12/23 | Temporal | 1.45      | 0.0034 | 193.00 | 0.05 | 0.0026   |
| AD        | 12/33 | Temporal | 1.93      | 0.0016 | 261.65 | 0.10 | 0.0007   |
| AD        | 12/34 | Temporal | 34.70     | 0.0641 | 608.76 | 0.15 | 0.0000   |
| AD        | 13/09 | Temporal | 5.34      | 0.0076 | 313.49 | 0.05 | 0.0025   |
| AD        | 13/10 | Temporal | 1.99      | 0.0060 | 311.67 | 0.12 | 0.0017   |
| AD        | 14/01 | Temporal | 3.71      | 0.0011 | 335.14 | 0.05 | 0.0003   |
| Control   | 14/04 | Temporal | 2.73      | 0.0038 | 269.49 | 0.15 | 0.0011   |
| AD        | 14/07 | Temporal | 8.46      | 0.0142 | 322.48 | 0.07 | 0.0021   |
| Control   | 14/11 | Temporal | 3.32      | 0.0026 | 206.06 | 0.04 | 0.0006   |
| Control   | 14/20 | Temporal | 6.32      | 0.0116 | 253.18 | 0.31 | 0.0081   |
| Control   | 14/46 | Temporal | 10.51     | 0.0080 | 241.66 | 0.09 | 0.0045   |
| Control   | 15/01 | Temporal | 1.82      | 0.0019 | 319.96 | 1.39 | 0.0017   |
| AD        | 15/19 | Temporal | 0.69      | 0.0012 | 172.37 | 0.03 | 0.0006   |
| AD        | 15/29 | Temporal | 1.30      | 0.0019 | 355.32 | 0.04 | 0.0010   |
| Control   | 15/31 | Temporal | 3.93      | 0.0007 | 200.53 | 0.04 | 0.0016   |
| Control   | 15/42 | Temporal | 2.60      | 0.0047 | 171.32 | 0.03 | 0.0015   |
| AD        | 15/48 | Temporal | 6.81      | 0.0072 | 556.94 | 0.14 | 0.0019   |
| AD        | 16/01 | Temporal | 0.87      | 0.0011 | 285.57 | 0.09 | 0.0009   |
| AD        | 16/08 | Temporal | 9.43      | 0.0112 | 279.78 | 0.09 | 0.0000   |
| AD        | 16/13 | Temporal | 1.29      | 0.0040 | 321.47 | 0.49 | 0.0017   |
| AD        | 16/14 | Temporal | 3.71      | 0.0096 | 360.64 | 0.06 | 0.0000   |

ICP-MS was conducted on fresh frozen brain tissue samples from the temporal lobe to determine concentrations ( $\mu\text{g/g}$  dry tissue) of aluminium, cerium, iron, lead, and platinum. Cases were classified as either control or Alzheimer's disease (AD) based on their pathological diagnosis.

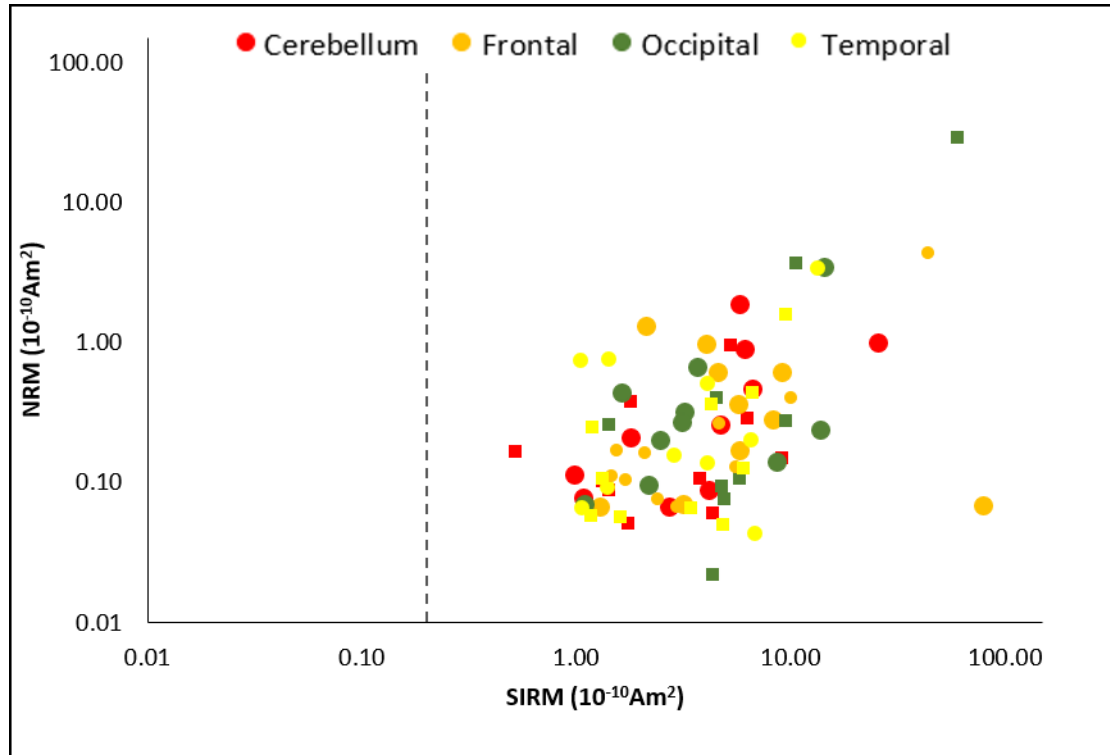

**Supplementary Figure S1.** NRM/SIRM values of human brain tissue samples. The NRM of 83 freeze-dried human brain tissue samples from MBB at  $293\text{K} \pm 0.5\text{K}$ . Dashed line indicates the measurement limit ( $2 \times 10^{-11} \text{Am}^2$ ) of the 2G SQUID magnetometer (Centre for Environmental Magnetism and Palaeomagnetism, Lancaster University). Circles indicate females, squares indicate males.

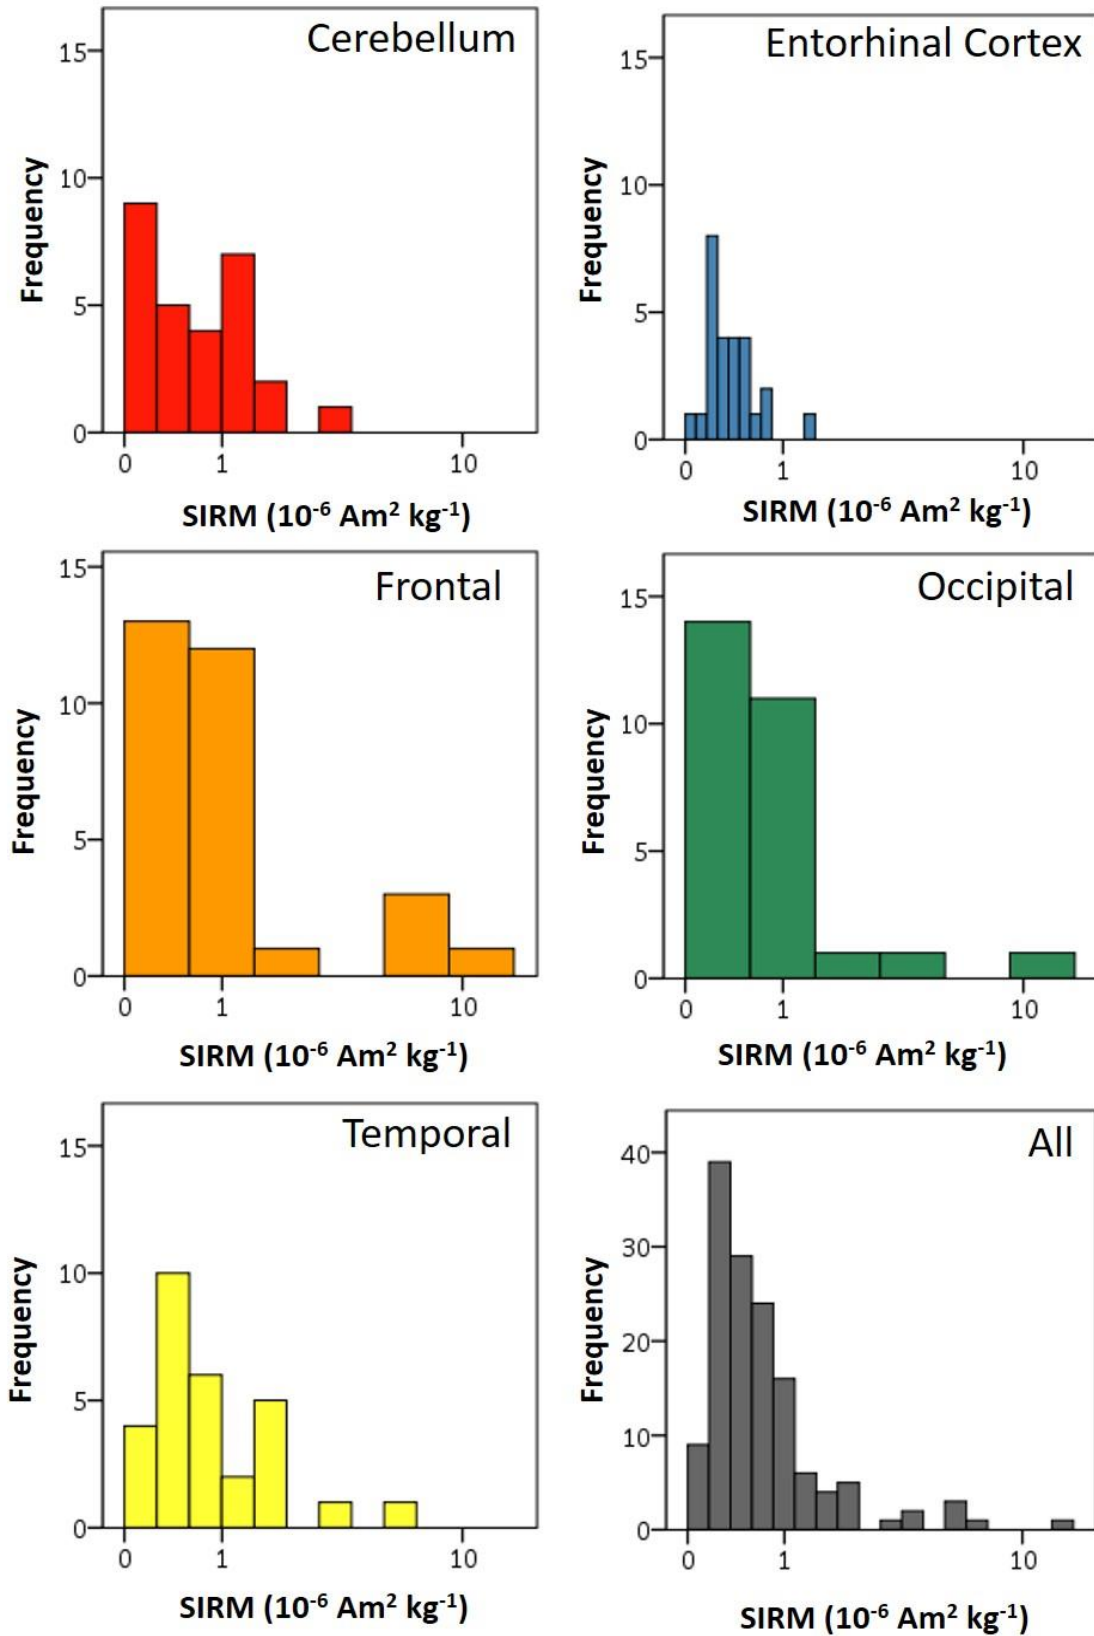

**Supplementary Figure S2.** Mass normalised saturation isothermal remanence magnetisations of human brain regions from MBB cases, UK. Histograms depict the mass-normalised (freeze-dried weights) SIRM values of human brain tissue samples (Manchester cases) from the cerebellum, entorhinal cortex, frontal lobe, occipital lobe, temporal lobe and all regions.

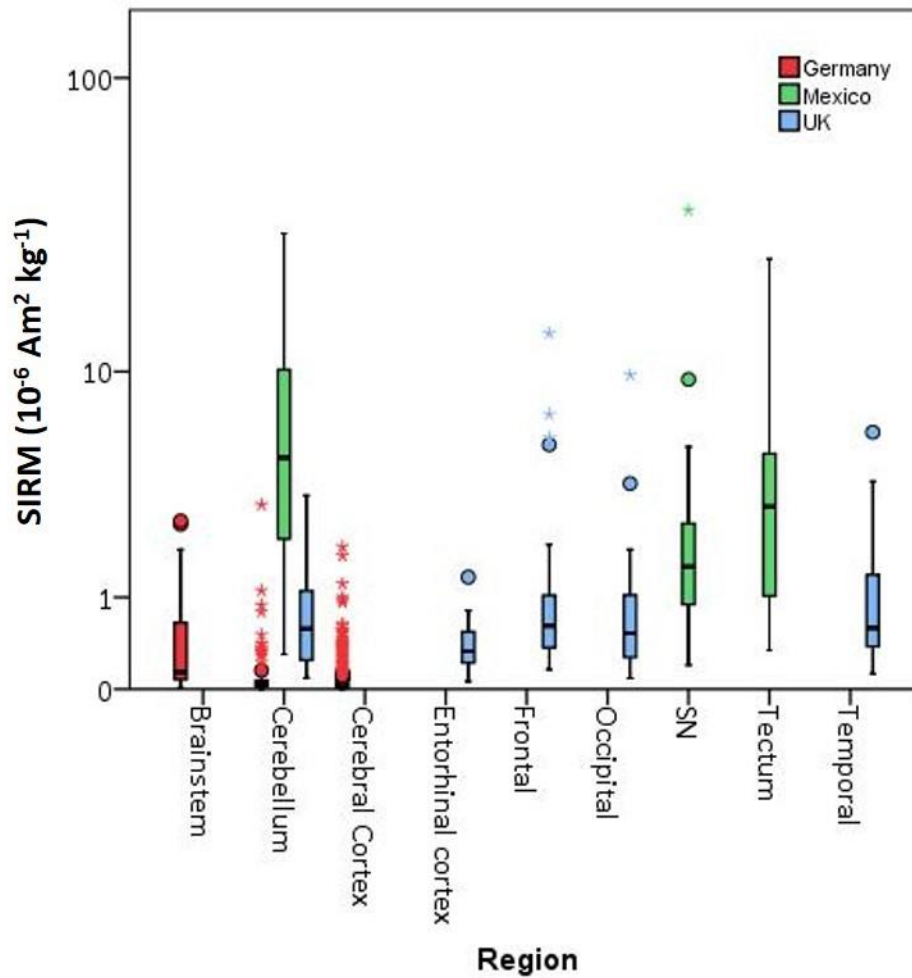

**Supplementary Figure S3.** Box plot of mass-normalised SIRM values of human brain regions. Box plots depict the mass-normalised (freeze-dried weights for Mexico and UK, wet/formalin-soaked weights for Germany) saturation isothermal remanence magnetisations (SIRMs) of human brain tissue samples from the brainstem, cerebellum and cerebral cortex from Germany (red)[1], the cerebellum, substantia nigra (SN) and tectum/tegmentum from Mexico City, Mexico[4], and the cerebellum, entorhinal cortex (EC), frontal lobe, occipital lobe and temporal lobe of cases from Manchester, UK (this study, blue). Outliers ( $\circ$ ) are more than 1.5x the interquartile range, extremes (\*) are more than 3x the interquartile range.

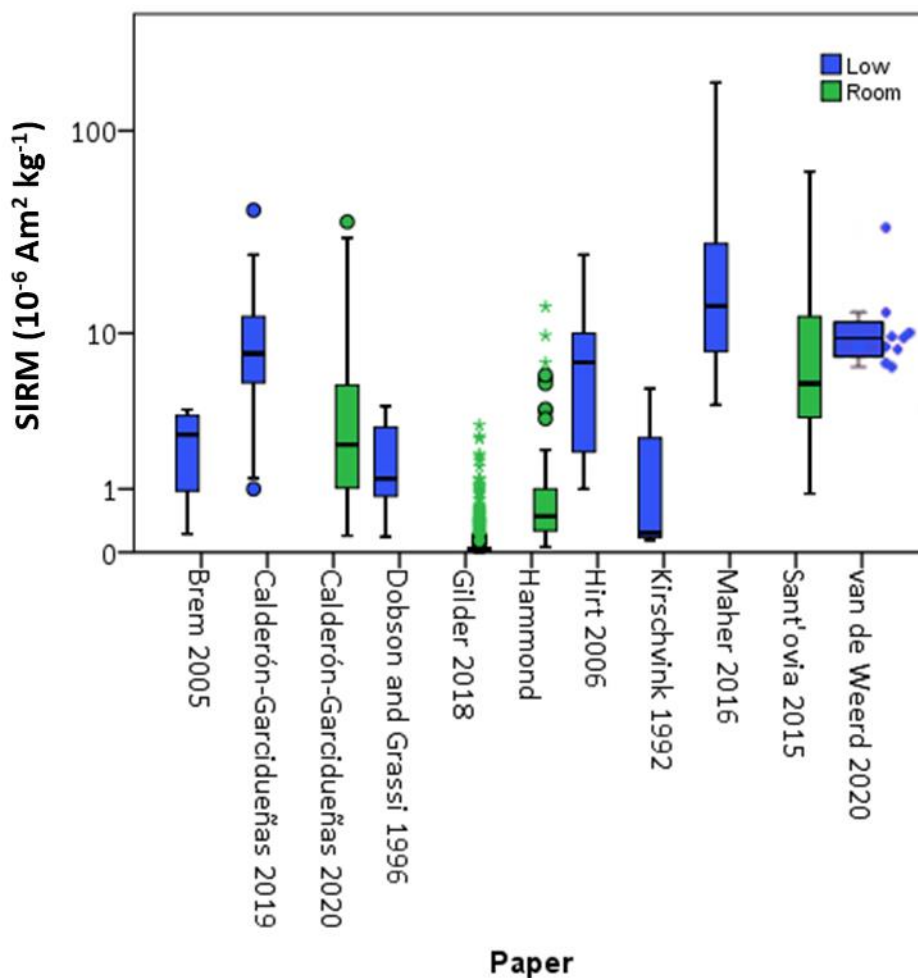

**Supplementary Figure S4.** Box plot of published mass-normalised SIRM values of human brain regions. Box plots depict the mass-normalised saturation isothermal remanence magnetisations (SIRMs) of human brain tissue samples measured at low (77 K) or room (293 K) temperature. The ‘van de Weerd 2020’ data were measured at 100K, and represents fresh frozen AD tissue (boxplot taken from [5]). The ‘Calderón-Garcidueñas 2019’ boxplot represents data from human frontal tissue samples. Data published in [1, 4-12]. Outliers ( $\circ$ ) are more than 1.5x the interquartile range, extremes (\*) are more than 3x the interquartile range. Samples obtained from the following locations: Brem et al., 2005, Zurich, Switzerland; Calderón-Garcidueñas et al., Mexico City and Veracruz, Mexico; Dobson & Grassi, 1996, Zurich, Switzerland; Gilder et al., Heideleberg, Wiesloch, Bayreuth, Germany; Hammond et al., N. England; Hirt et al., Zurich, Switzerland; Maher et al., N England and Mexico City; Sant’ovia et al., Porto, Portugal; Van de Weerd et al., Amsterdam, Netherlands.

## Supplementary references

1. Gilder, S.A., et al., *Distribution of magnetic remanence carriers in the human brain*. Scientific Reports, 2018. **8**(1): p. 11363.
2. Acosta-Cabronero, J., et al., *In vivo MRI Mapping of Brain Iron Deposition across the Adult Lifespan*. The Journal of Neuroscience, 2016. **36**(2): p. 364.
3. Giannakopoulos, P., et al., *Interhemispheric distribution of Alzheimer disease and vascular pathology in brain aging*. Stroke, 2009. **40**(3): p. 983-986.
4. Calderón-Garcidueñas, L., et al., *Quadruple abnormal protein aggregates in brainstem pathology and exogenous metal-rich magnetic nanoparticles. The substantia nigrae is a very early target in young urbanites and the gastrointestinal tract likely a key brainstem portal*. Environmental Research, 2020: p. 110139.
5. van der Weerd, L., et al., *Effects of Alzheimer's disease and formalin fixation on the different mineralised-iron forms in the human brain*. Scientific Reports, 2020. **10**(1): p. 16440.
6. Brem, F., et al., *Characterization of iron compounds in tumour tissue from temporal lobe epilepsy patients using low temperature magnetic methods*. Biometals, 2005. **18**(2): p. 191-197.
7. Calderón-Garcidueñas, L., et al., *Combustion- and friction-derived magnetic air pollution nanoparticles in human hearts*. Environmental Research, 2019. **176**: p. 108567.
8. Dobson, J. and P. Grassi, *Magnetic properties of human hippocampal tissue—Evaluation of artefact and contamination sources*. Brain Research Bulletin, 1996. **39**(4): p. 255-259.
9. Hirt, A.M., et al., *Anomalous magnetic properties of brain tissue at low temperature: The 50 K anomaly*. Journal of Geophysical Research: Solid Earth, 2006. **111**(B12).
10. Kirschvink, J.L., A. Kobayashi-Kirschvink, and B.J. Woodford, *Magnetite biomineralization in the human brain*. Proceedings of the National Academy of Sciences, 1992. **89**(16): p. 7683-7687.
11. Maher, B.A., et al., *Magnetite pollution nanoparticles in the human brain*. Proceedings of the National Academy of Sciences, 2016. **113**(39): p. 10797-10801.
12. Sant'Ovaia, H., et al., *Magnetic susceptibility and isothermal remanent magnetization in human tissues: a study case*. Biometals, 2015. **28**(6): p. 951-8.
